# Supplementary material for: A new platform for rapid and indiscriminate detection of environmental pollutants based on surface-enhanced Raman spectroscopy
Source: Royal Society of Chemistry journal article supplement (doi:10.1039/d3en00461a), 2023-01-01
Supplement: d3en00461a1.pdf [file d3en00461a1.pdf]

## **Supplementary Information**

# **A new platform for rapid and indiscriminate detection of environmental pollutants based on surface-enhanced Raman spectroscopy**

Xinyu Yao<sup>[a]</sup>, Jingyi Lin<sup>[d]</sup>, Qiang Zhou<sup>[e]</sup>, Yingli Song<sup>[a]</sup>, Tingting Sun<sup>[e]</sup>, Xiaohong Qiu<sup>[e]</sup>, Bo Cao<sup>\*[a]</sup>, Yang Li<sup>\*[b][f]</sup>

<sup>a</sup> College of Basic Medicine, Harbin Medical University; Harbin, Heilongjiang Province, 150081, PR. China.

<sup>b</sup> Department of Pharmaceutical Analysis and Analytical Chemistry (Research Center for Innovative Technology of Pharmaceutical Analysis), College of Pharmacy, Harbin Medical University, 157 Baojian Road, Harbin, Heilongjiang Province 150081, P.R. China.

<sup>c</sup> The Second Affiliated Hospital of Harbin Medical University, Harbin Medical University; Harbin, Heilongjiang Province, 150081, PR. China.

<sup>d</sup> The Fourth Affiliated Hospital of Harbin Medical University, Harbin Medical University; Harbin, Heilongjiang Province, 150081, PR. China.

<sup>e</sup> Department of Anesthesiology, Cancer Hospital of Harbin Medical University; Harbin, Heilongjiang Province, 150081, PR. China.

<sup>f</sup> Faculty of Biochemistry and Molecular Medicine, University of Oulu, Aapistie 5A, 90220 Oulu, Finland

\* Corresponding author E-mail: [liy@hrbmu.edu.cn](mailto:liy@hrbmu.edu.cn), [caobo@hrbmu.edu.cn](mailto:caobo@hrbmu.edu.cn)

## TABLE OF CONTENT

|                                                                                                                                       |    |
|---------------------------------------------------------------------------------------------------------------------------------------|----|
| <i>Supplementary Information</i> .....                                                                                                | 1  |
| S1. The enhancement factor (EF) of Ag@BOCNPs.....                                                                                     | 3  |
| S2. TEM spectra of the Ag@BO and Ag@BOCNPs.....                                                                                       | 4  |
| S3. SERS signals from different substrates .....                                                                                      | 4  |
| S4. Synthesis of silver nanoparticles from different concentrations of sodium borohydride.....                                        | 5  |
| S5. Raman signals intensity of melamine molecules under different enhanced substrate systems with different exposure times.....       | 6  |
| S6. Particle size diagram of silver nanoparticles .....                                                                               | 7  |
| S7. SERS signals of melamine before and after Ca <sup>2+</sup> addition.....                                                          | 7  |
| S8. SERS signals of <i>S. aureus</i> (10 <sup>6</sup> CFU/mL) on conventional method compared to the current method (Ag@BOCNPs) ..... | 8  |
| S9. Detection limits for the crystal violet .....                                                                                     | 8  |
| S10. SERS spectra of food adulterants .....                                                                                           | 9  |
| S11. Raman signals of pure sulfite and nitrite .....                                                                                  | 10 |
| S12. SERS signal of NaNO <sub>3</sub> .....                                                                                           | 10 |
| S13. The Raman peak assign to virus .....                                                                                             | 11 |
| S14. References.....                                                                                                                  | 12 |

## S1. The enhancement factor (EF) of Ag@BOCNPs

$I_R$  is the Raman intensity of the melamine solution and  $I_S$  is the SERS intensity of melamine under the condition of adding  $\text{Ca}^{2+}$  to the enhanced substrate.  $N_R$  is the number of molecules irradiated by melamine in the Raman detection, and  $N_S$  is the number of molecules irradiated by melamine in the SERS detection in the presence of  $\text{Ca}^{2+}$  added to the enhanced substrate. Because we performed the test in a capillary, the cross-sectional area and volume of the test were the same. The simplified formula is:  $\text{EF} = I_S \cdot C_R / I_R \cdot C_S$

The concentration of melamine solution detected by Raman was 3mg/mL. The concentration of melamine solution used for SERS detection was 100ng/mL. For SERS detection, 10 $\mu\text{L}$  of the sample was mixed with 10 $\mu\text{L}$  of silver sol, followed by 1 $\mu\text{L}$   $\text{CaCl}_2$  solution.

$$C_R = 3 \text{ mg/mL}$$

$$C_S = (1 \times 10^{-4} \text{ mg/mL} \times 10 \mu\text{L} \times 10^{-3}) / (10 + 10 + 1) \mu\text{L} \times 10^{-3} = 4.76 \times 10^{-5} \text{ mg/mL}$$

$$\text{EF}_{702} = (10819 \times 3) / (19 \times 4.76 \times 10^{-5}) = 3.596 \times 10^7$$

## S2. TEM spectra of the Ag@BO and Ag@BOCNPs

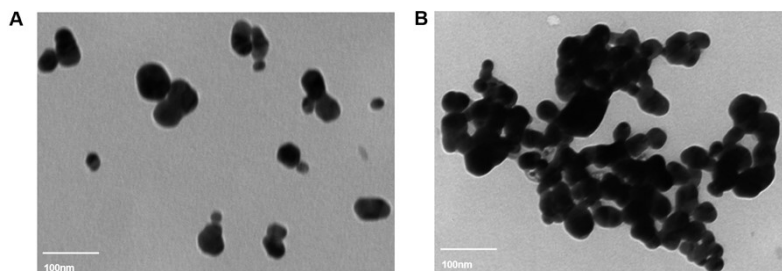

Figure S1. TEM images of the Ag@BO (A) and Ag@BOCNPs (B).

## S3. SERS signals from different substrates

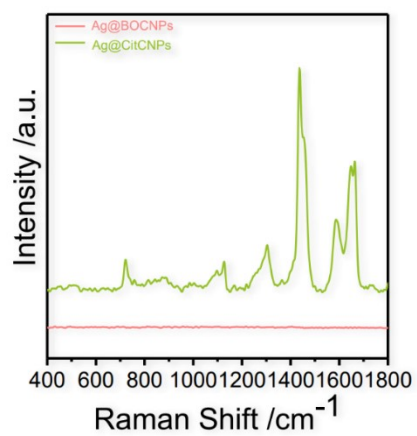

Figure S2. SERS spectra of silver nanoparticles reduced by sodium citrate (green line) and sodium borohydride (pink line) after adding  $\text{Ca}^{2+}$ .

#### S4. Synthesis of silver nanoparticles from different concentrations of sodium borohydride.

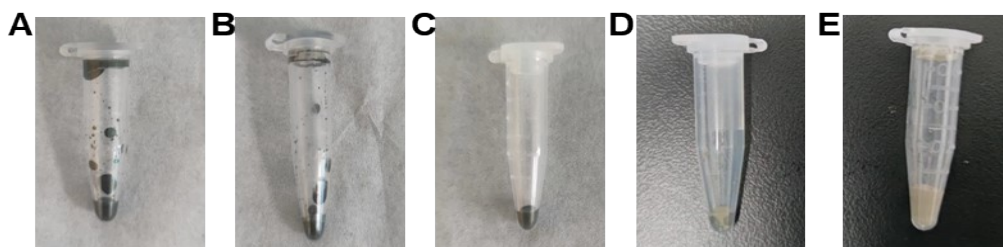

**Figure S3.** Silver nanoparticles synthesized by sodium borohydride and silver nitrate in different proportions, and their color states after centrifugation. (A)The ratio of silver nitrate to sodium borohydride is 1:5; (B)The ratio of silver nitrate to sodium borohydride is 1:6; (C)The ratio of silver nitrate to sodium borohydride is 1:7; (D)The ratio of silver nitrate to sodium borohydride is 1:8; (E)The ratio of silver nitrate to sodium borohydride is 1:9.

## S5. Raman signals intensity of melamine molecules under different enhanced substrate systems with different exposure times

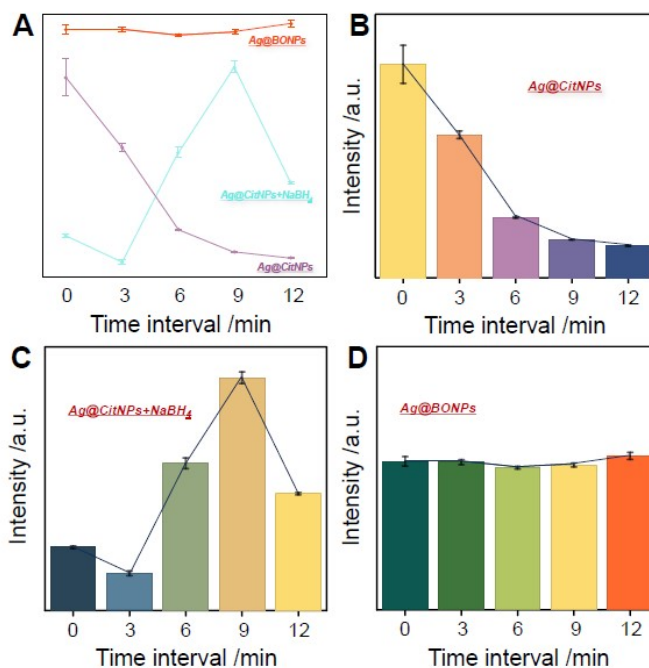

**Figure S4.** (A) The SERS signal intensity changes of melamine were obtained by exposure of Ag@CitNPs (purple line), Ag@CitNPs+NaBH<sub>4</sub> (blue line) and Ag@BONPs (orange line) silver nanoparticles to air for different time intervals (3 minute interval); (B) The peak intensity histogram of melamine was detected by exposing sodium citrate reduced silver nanoparticles at different time intervals in the air; (C) The peak intensity histogram of melamine was detected by exposure of sodium citrate reduced silver nanoparticles and sodium borohydride system at different time intervals in the air; (D) The peak intensity histogram of melamine was detected by exposing sodium borohydride reduced silver nanoparticles at different time intervals.

## S6. Particle size diagram of silver nanoparticles

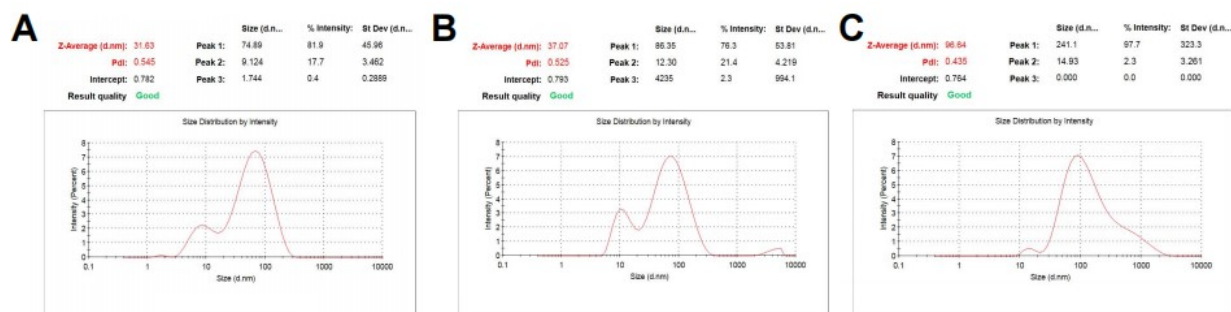

**Figure S5:** (A) The particle size diagram of Ag@BO; (B) Ag@BO Particle size plot of melamine added; (C) Particle size plots after Ca<sup>2+</sup> was added to the systems of Ag@BO and melamine.

## S7. SERS signals of melamine before and after Ca<sup>2+</sup> addition

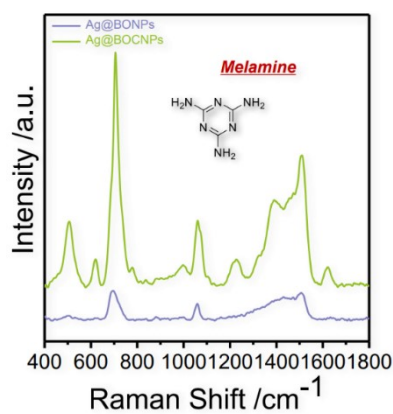

**Figure S6:** The SERS signal of melamine was obtained using Ag@BONPs (blue line) and Ag@BOCNPs (green line) silver nanoparticles.

## S8. SERS signals of *S. aureus* ( $10^6$ CFU/mL) on conventional method compared to the current method (Ag@BOCNPs)

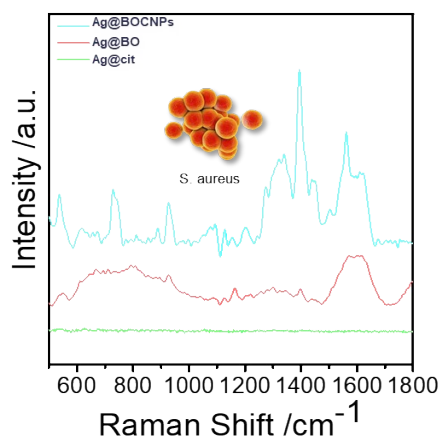

**Figure S7:** SERS signals of *S. aureus* were obtained by Ag@cit (green line) and Ag@BO (red line) silver nanoparticles; SERS spectrum of *S. aureus* was obtained using the present method (blue line).

## S9. Detection limits for the crystal violet

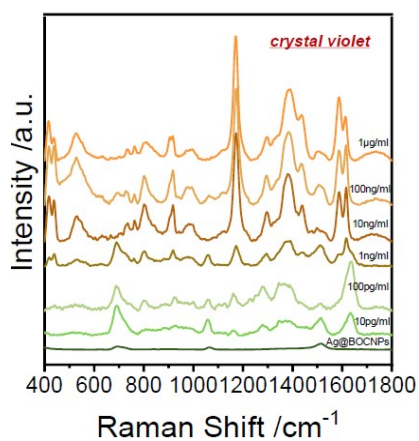

**Figure S8.** SERS spectra of crystal violet at various concentrations.



## S10. SERS spectra of food adulterants

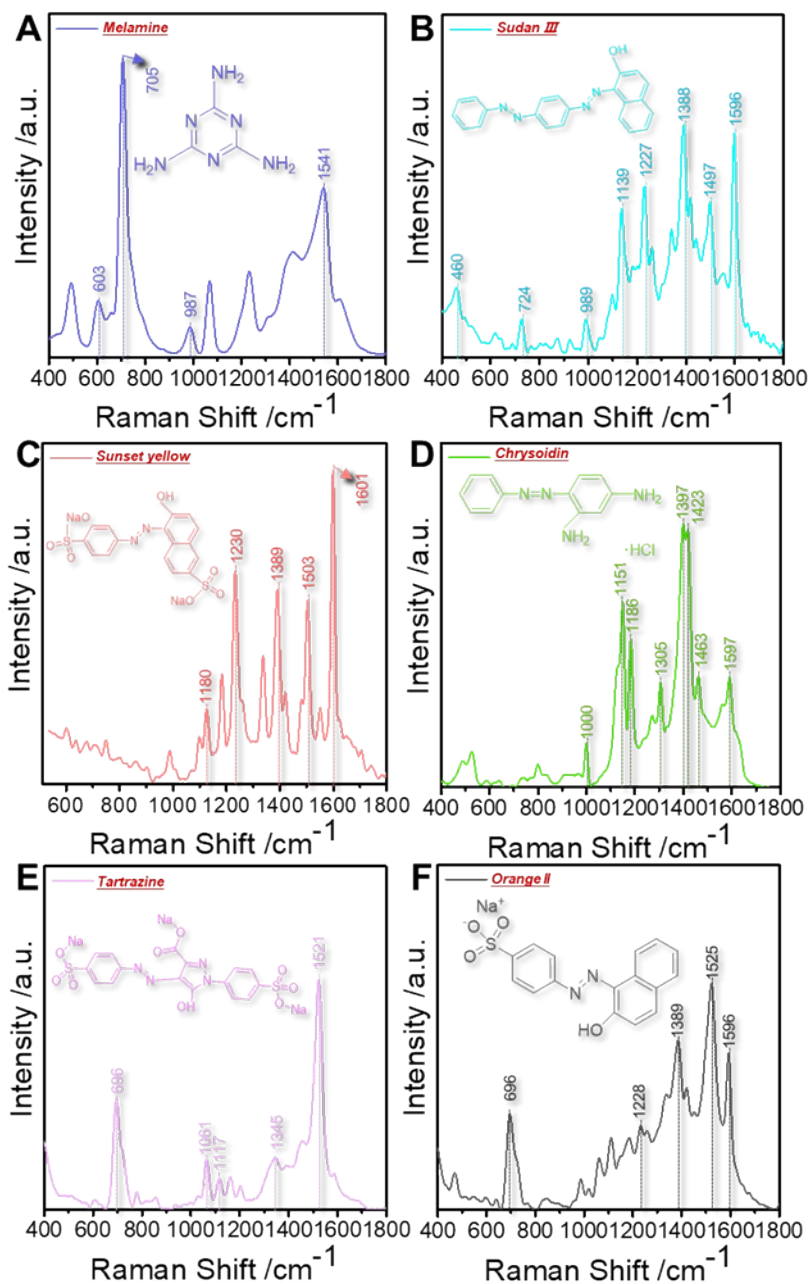

**Figure S9.** SERS spectra of melamine and five banned colorants. (A) SERS spectrum of melamine; (B) SERS spectrum of Sudan III; (C) SERS spectrum of Sunset yellow; (D) SERS spectrum of chrysoidin; (E) SERS spectrum of tartrazine; (F) SERS spectrum of orange II.

## S11. Raman signals of pure sulfite and nitrite

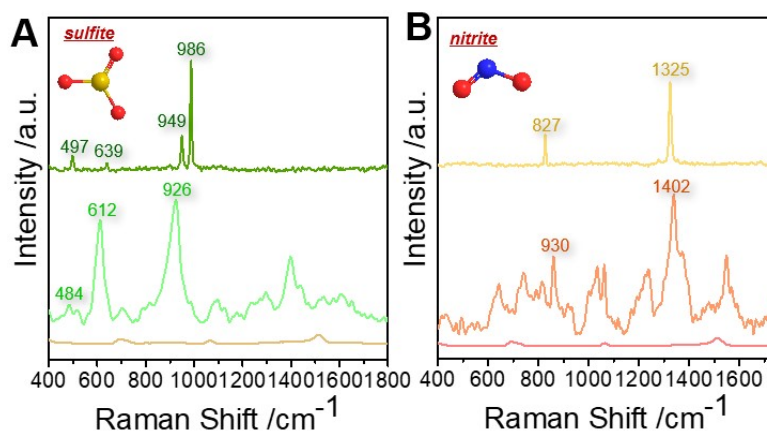

**Figure S10.** (A) Raman signal of pure sulfite (dark green line), SERS signal of sulfite (light green line, 1  $\mu\text{g/mL}$ ), and signal of Ag@BOCNPs (yellow line); (B) Raman signal of pure nitrite (light yellow line), SERS signal of nitrite (orange line, 1  $\mu\text{g/mL}$ ), and signal of Ag@BOCNPs (pink line).

## S12. SERS signal of $\text{NaNO}_3$

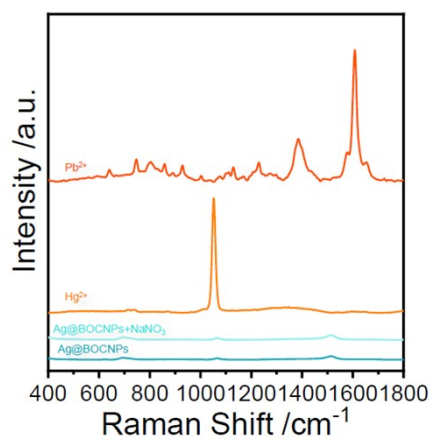

**Figure S11.** SERS signal of  $\text{Pb}^{2+}$  (red line), SERS signal of  $\text{Hg}^{2+}$  (orange line), SERS signal of Ag@BOCNPs+ $\text{HNO}_3$  (wathet blue), and signal of Ag@BOCNPs (deep blue green line).

## S13. The Raman peak assign to virus

**Table S1:** The bands and their assignment appeared in the SERS spectra of virus

| Raman Shift (cm <sup>-1</sup> ) | Assignment                                   | Ref. |
|---------------------------------|----------------------------------------------|------|
| ~723                            | adenine                                      | 1    |
| 744                             | adenine                                      | 1    |
| 761                             | Tryptophan                                   | 2    |
| 799                             | Cytosine + Uracil                            | 2    |
| 816                             | The phosphate backbone stretch<br>of the RNA | 3    |
| 828                             | The phosphate backbone stretch<br>of the RNA | 3    |
| ~857                            | Tyrosine                                     | 1    |
| 874                             | Tryptophan                                   | 4    |
| ~884                            | Tryptophan                                   | 4    |
| ~960                            | Ribose                                       | 4    |
| ~1002                           | Phenylalanine                                | 5    |
| ~1030                           | Phenylalanine                                | 5    |
| ~1099                           | Phenylalanine                                | 4    |
| ~1123                           | $\nu_{14}B_{1g}$                             | 2    |
| ~1162                           | Tyr/ $\nu_{30}B_{2g}$                        | 2    |
| 1206                            | Amide III                                    | 3    |
| 1219                            | Phenylalanine                                | 2    |

Note:  $\nu$  = stretch, br = breathing, bk = backbone.

## S14. References

1. K. Sivashanmugan, J.-D. Liao, J.-W. You and C.-L. Wu, Focused-ion-beam-fabricated Au/Ag multilayered nanorod array as SERS-active substrate for virus strain detection, *Sensors and Actuators B: Chemical*, 2013, **181**, 361-367.
2. C.-W. Chang, J.-D. Liao, A.-L. Shiau and C.-K. Yao, Non-labeled virus detection using inverted triangular Au nano-cavities arrayed as SERS-active substrate, *Sensors and Actuators B: Chemical*, 2011, **156**, 471-478.
3. S. Shanmukh, L. Jones, J. Driskell, Y. Zhao, R. Dluhy and R. A. Tripp, Rapid and sensitive detection of respiratory virus molecular signatures using a silver nanorod array SERS substrate, *Nano letters*, 2006, **6**, 2630-2636.
4. X. Zhang, X. Zhang, C. Luo, Z. Liu, Y. Chen, S. Dong, C. Jiang, S. Yang, F. Wang and X. Xiao, Volume-enhanced raman scattering detection of viruses, *Small*, 2019, **15**, 1805516.
5. R. A. Tripp, R. A. Dluhy and Y. Zhao, Novel nanostructures for SERS biosensing, *Nano Today*, 2008, **3**, 31-37.
